# Supplementary material for: Adjuvant-specific regulation of long-term antibody responses by ZBTB20
Source: PubMed Central journal article supplement — J Exp Med. 2014 May 5;211(5):841–56. doi: 10.1084/jem.20131821 (PMC4010912; doi:10.1084/jem.20131821), 2014-05-05
Supplement: supp_jem.20131821_JEM_20131821_sm.pdf [file supp_jem.20131821_JEM_20131821_sm.pdf]

SUPPLEMENTAL MATERIAL

Wang and Bhattacharya, <http://www.jem.org/cgi/content/full/jem.20131821/DC1>

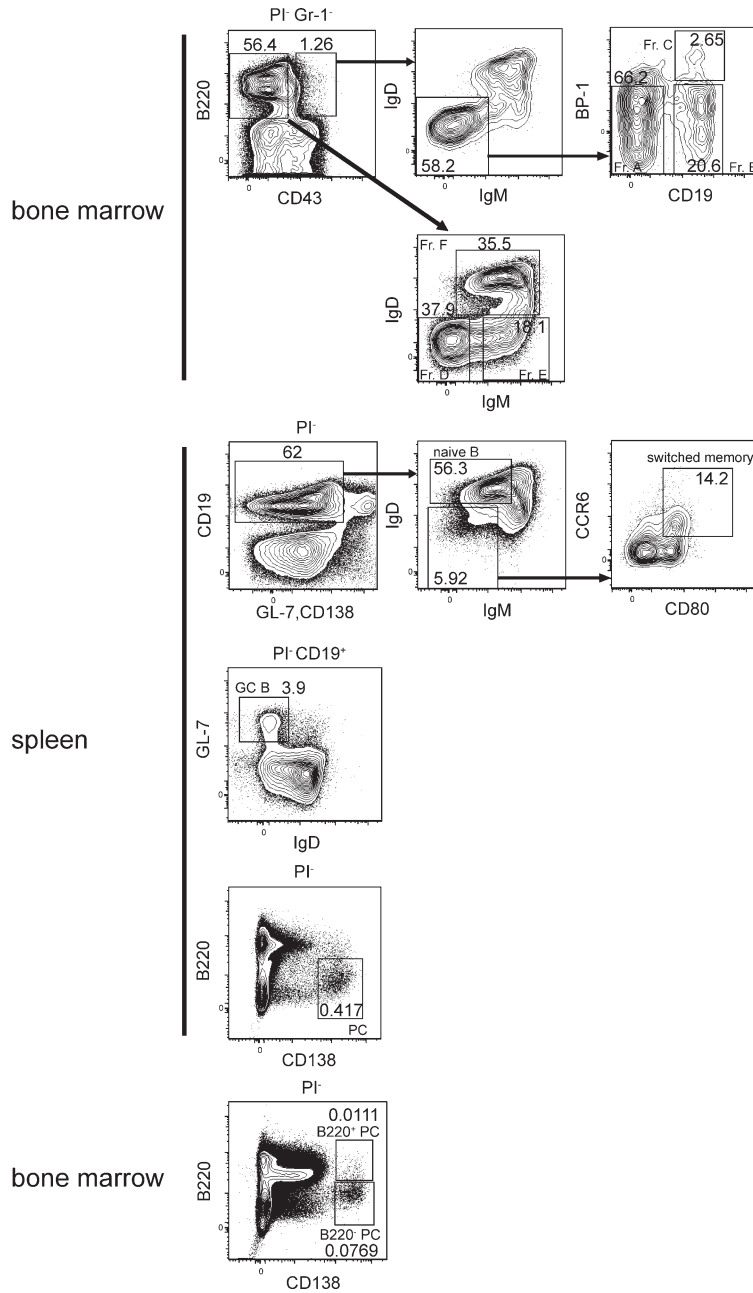

**Figure S1. Gating strategies for B cell subsets.** Flow cytometry gating strategies for B cell subsets shown in Fig. 1 A. Fr., fraction; GC B, germinal center B cell; PC, plasma cell; PI, propidium iodide (for excluding dead cells).

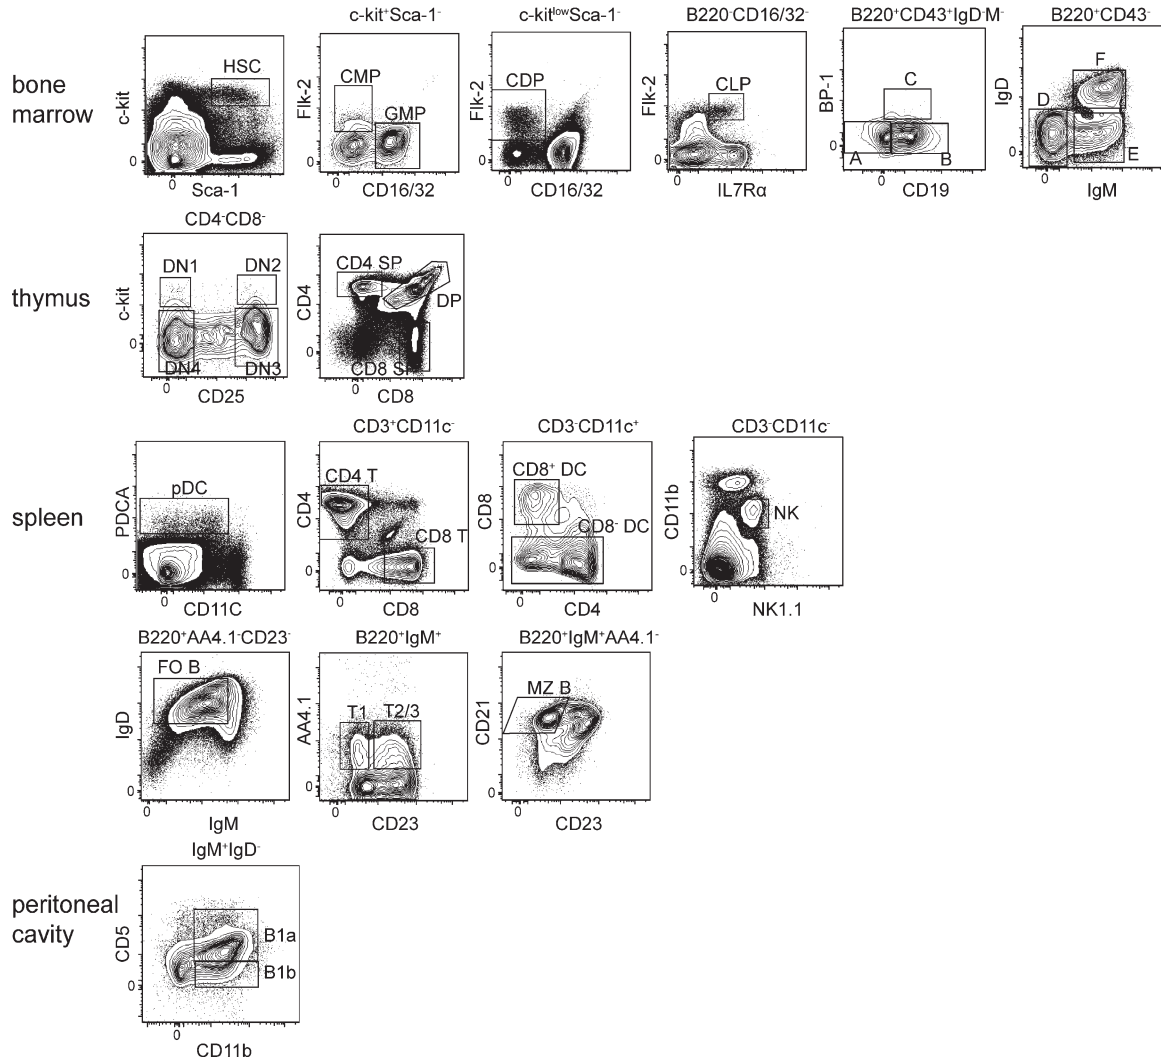

**Figure S2. ZBTB20 is not required for hematopoietic development.** Flow cytometry gating strategies of hematopoietic stem cells (HSCs), common myeloid progenitors (CMPs), common DC progenitors (CDPs), common lymphoid progenitors (CLPs), and Hardy fraction A-F cells in the BM; CD4 CD8 double-negative (DN) 1–4, double positive (DP), and single positive (SP) thymocytes in the thymus; immature transitional B cells (T1–T3), follicular B cells (FO B), marginal zone B cells (MZ B), plasmacytoid DCs (pDCs), CD8 $\alpha^+$  DCs, CD8 $\alpha^-$  DCs, NK cells, and CD4<sup>+</sup> and CD8<sup>+</sup> T cells in the spleen; and B1-a and B1-b B cells in the peritoneal cavity. Example plots show cells from a *Zbtb20<sup>trap/trap</sup>* chimera. Data are representative of three biologically distinct samples.
